# Supplementary material for: Prostate cancer polygenic risk score and prediction of lethal prostate cancer
Source: PubMed Central journal article supplement (PMC8993880; doi:10.1038/s41698-022-00266-8), 2022-04-08
Supplement: 41698_2022_266_MOESM1_ESM.pdf [file 41698_2022_266_MOESM1_ESM.pdf]

**Supplementary Figure 1. Flowchart for the MDC Study.**

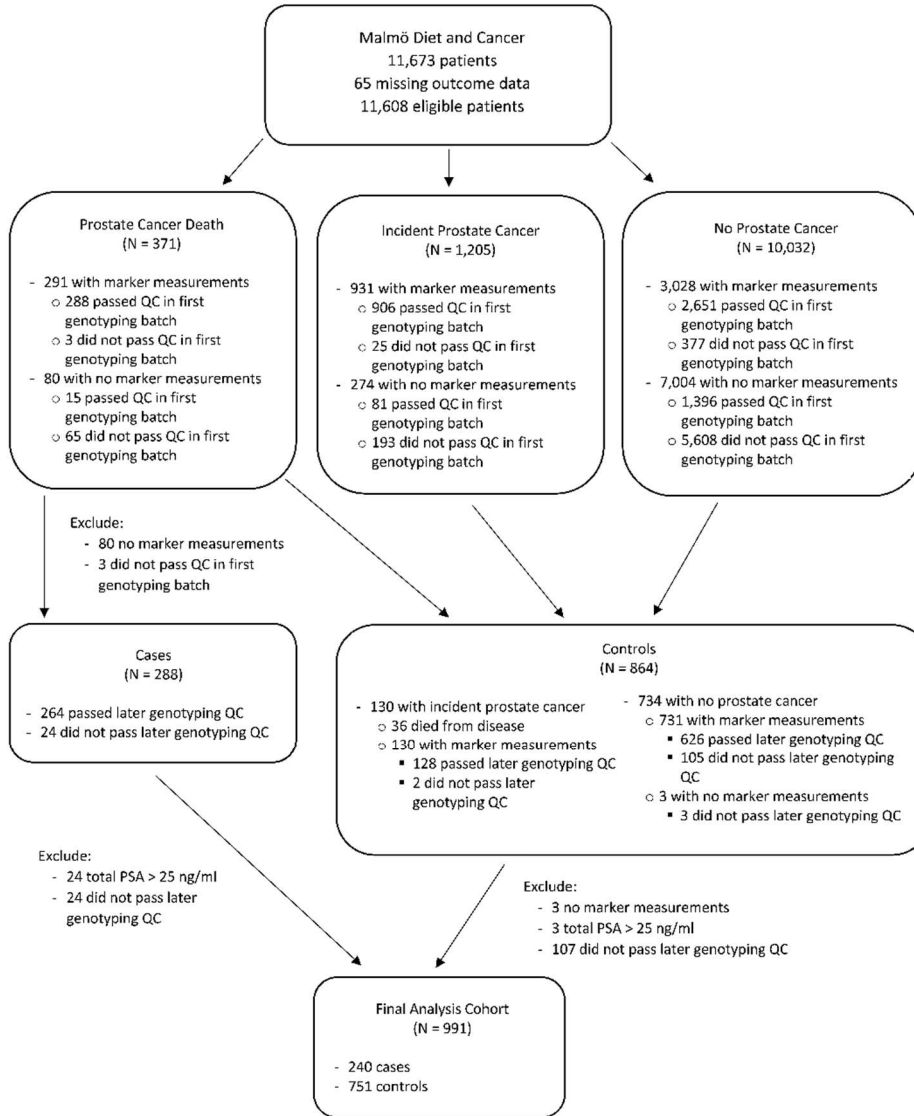

**Supplementary Figure 2.** Flowchart for the VIP cohort.

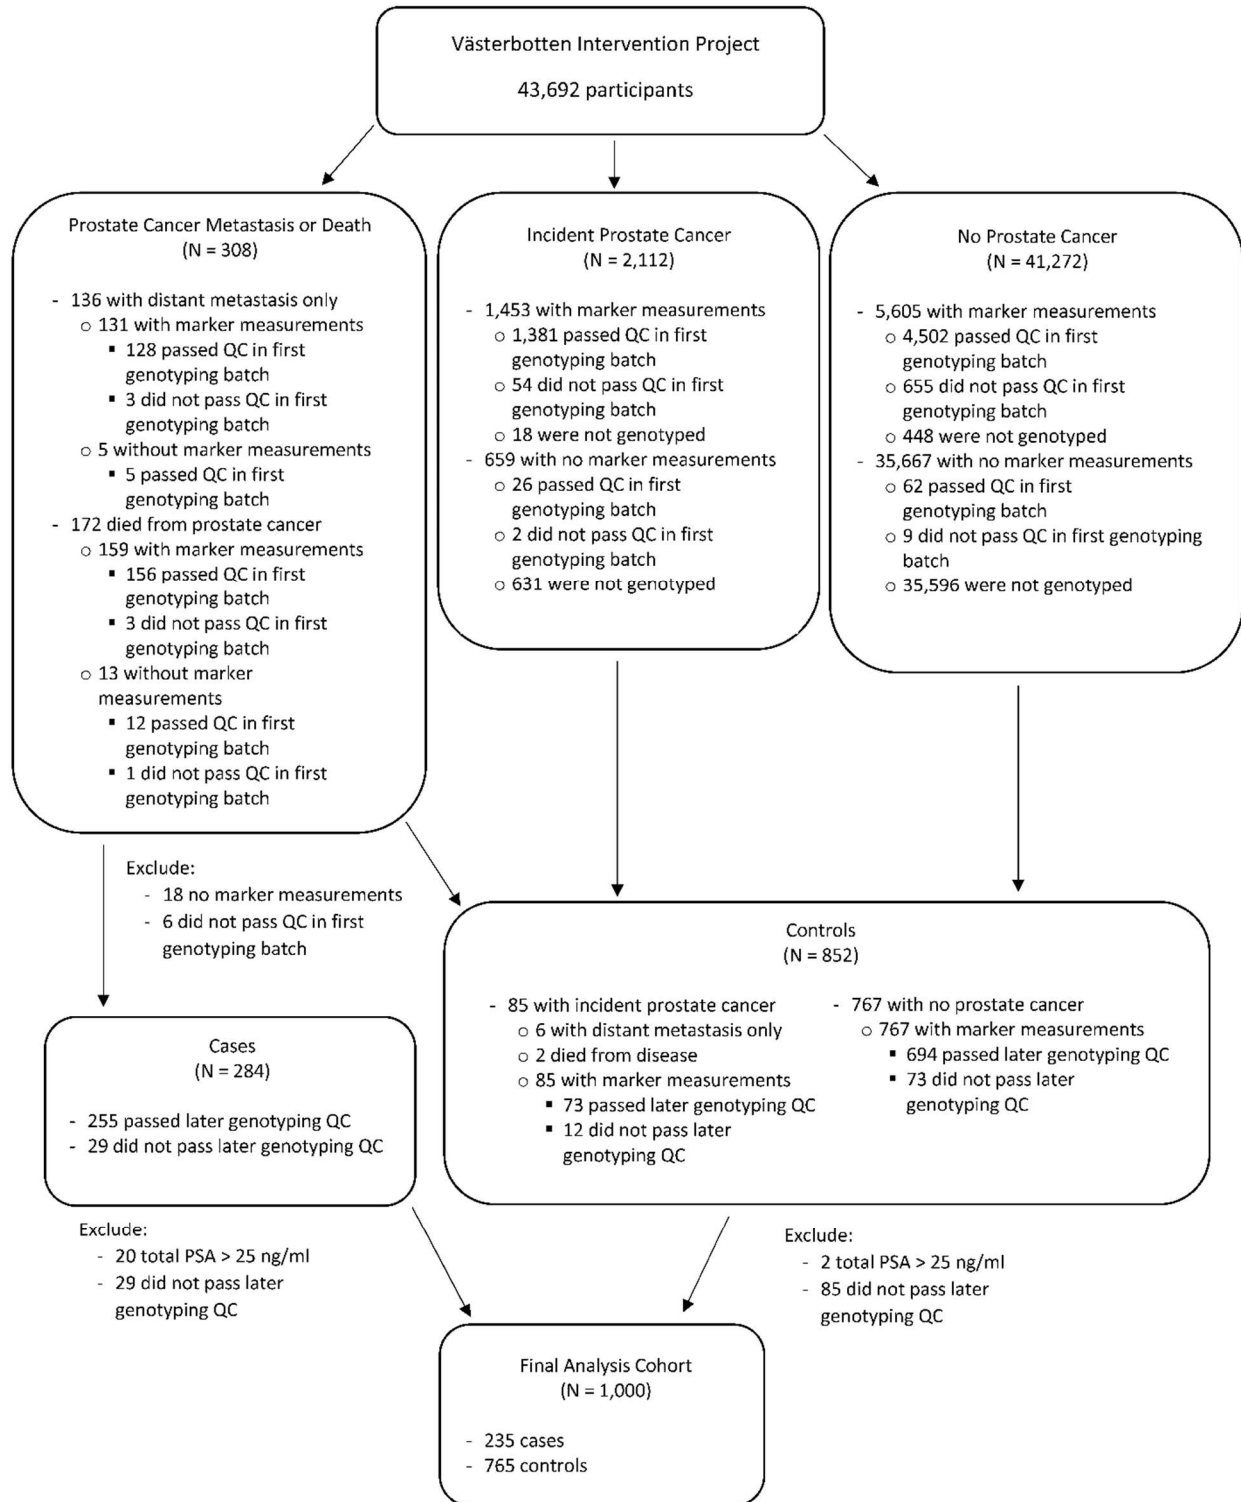

**Supplementary Table 1.** Discrimination for 145-SNP Practical risk score, total PSA and the 4kscore, and change in discrimination when adding this score to total PSA and the 4kscore for the outcome of prostate cancer death, in the MDC cohort only. Change in discrimination is presented only when MDC practical risk score is associated with outcome at  $p \leq 0.1$ .

|              | Practical Risk Score (145-SNP) | Total PSA | Practical Risk Score (145-SNP) + Total PSA | Change in AUC from Total PSA Alone | 4kscore | Practical Risk Score (145-SNP) + 4kscore | Change in AUC from 4kscore Alone |
|--------------|--------------------------------|-----------|--------------------------------------------|------------------------------------|---------|------------------------------------------|----------------------------------|
| PSA $\geq 0$ | 0.634                          | 0.792     | 0.787                                      | -0.005                             | 0.769   | 0.780                                    | 0.011                            |
| PSA $\leq 1$ | 0.675                          | 0.671     | 0.713                                      | 0.043                              | ---     | ---                                      | ---                              |
| PSA $\geq 1$ | 0.596                          | 0.721     | 0.716                                      | -0.006                             | 0.750   | 0.750                                    | -0.001                           |
| PSA $\geq 2$ | 0.567                          | 0.644     | 0.645                                      | ---                                | 0.717   | 0.716                                    | ---                              |
| PSA $\geq 3$ | 0.568                          | 0.650     | 0.652                                      | 0.002                              | 0.713   | 0.720                                    | ---                              |
| PSA $\geq 4$ | 0.561                          | 0.576     | 0.613                                      | ---                                | 0.695   | 0.704                                    | ---                              |

**Supplementary Table 2.** AUCs for all selected polygenic risk scores for the outcome of death from prostate cancer in the MDC cohort, including all men regardless of PSA.

| PRS       | SNPs matched / SNPs in PRS | PRS Only | Total PSA | PRS + Total PSA | Change in AUC from Total PSA Alone | 4Kscore | PRS + 4Kscore | Change in AUC from 4Kscore Alone |
|-----------|----------------------------|----------|-----------|-----------------|------------------------------------|---------|---------------|----------------------------------|
| pgs000030 | 143/147                    | 0.623    | 0.808     | 0.782           | -0.025                             | 0.787   | 0.794         | 0.007                            |
| pgs000044 | 66/66                      | 0.593    | 0.808     | 0.782           | -0.026                             | 0.787   | 0.792         | 0.005                            |
| pgs000049 | 103/103                    | 0.641    | 0.808     | 0.781           | -0.026                             | 0.787   | 0.795         | 0.008                            |
| pgs000067 | 46/54                      | 0.530    | 0.808     | 0.796           | -0.011                             | 0.787   | 0.787         | 0.000                            |
| pgs000084 | 161/161                    | 0.565    | 0.808     | 0.779           | -0.029                             | 0.787   | 0.779         | -0.008                           |
| pgs000160 | 79/79                      | 0.597    | 0.808     | 0.784           | -0.024                             | 0.787   | 0.786         | -0.001                           |
| pgs000333 | 6605953/6606785            | 0.620    | 0.808     | 0.775           | -0.032                             | 0.787   | 0.783         | -0.004                           |
| pgs000348 | 34/72                      | 0.568    | 0.808     | 0.785           | -0.022                             | 0.787   | 0.782         | -0.005                           |
| pgs000565 | 21/21                      | 0.579    | 0.808     | 0.778           | -0.030                             | 0.787   | 0.785         | -0.002                           |
| pgs000566 | 1111494/1111494            | 0.564    | 0.808     | 0.790           | -0.018                             | 0.787   | 0.785         | -0.002                           |
| pgs000567 | 78/78                      | 0.560    | 0.808     | 0.793           | -0.015                             | 0.787   | 0.794         | 0.007                            |
| pgs000568 | 1398/1401                  | 0.591    | 0.808     | 0.782           | -0.025                             | 0.787   | 0.795         | 0.008                            |
| pgs000569 | 49/49                      | 0.600    | 0.808     | 0.773           | -0.035                             | 0.787   | 0.783         | -0.004                           |
| pgs000570 | 1111493/1111493            | 0.608    | 0.808     | 0.775           | -0.033                             | 0.787   | 0.782         | -0.006                           |
| pgs000571 | 100/100                    | 0.598    | 0.808     | 0.770           | -0.038                             | 0.787   | 0.779         | -0.008                           |
| pgs000572 | 1808/1809                  | 0.604    | 0.808     | 0.774           | -0.034                             | 0.787   | 0.788         | 0.001                            |
| pgs000573 | 31/31                      | 0.608    | 0.808     | 0.771           | -0.037                             | 0.787   | 0.781         | -0.006                           |
| pgs000574 | 1111493/1111493            | 0.575    | 0.808     | 0.781           | -0.026                             | 0.787   | 0.783         | -0.004                           |
| pgs000575 | 47/47                      | 0.618    | 0.808     | 0.774           | -0.034                             | 0.787   | 0.784         | -0.004                           |
| pgs000576 | 904/905                    | 0.601    | 0.808     | 0.774           | -0.033                             | 0.787   | 0.784         | -0.003                           |
| pgs000577 | 117/117                    | 0.616    | 0.808     | 0.784           | -0.024                             | 0.787   | 0.794         | 0.007                            |
| pgs000578 | 117/117                    | 0.616    | 0.808     | 0.784           | -0.024                             | 0.787   | 0.794         | 0.007                            |
| pgs000579 | 122/122                    | 0.602    | 0.808     | 0.779           | -0.029                             | 0.787   | 0.789         | 0.002                            |
| pgs000580 | 118/118                    | 0.616    | 0.808     | 0.784           | -0.023                             | 0.787   | 0.794         | 0.007                            |
| pgs000581 | 377/377                    | 0.627    | 0.808     | 0.775           | -0.033                             | 0.787   | 0.789         | 0.002                            |
| pgs000582 | 377/377                    | 0.627    | 0.808     | 0.775           | -0.033                             | 0.787   | 0.789         | 0.002                            |
| pgs000583 | 1119311/1119311            | 0.651    | 0.808     | 0.771           | -0.037                             | 0.787   | 0.788         | 0.001                            |
| pgs000584 | 1120596/1120596            | 0.648    | 0.808     | 0.770           | -0.038                             | 0.787   | 0.788         | 0.001                            |
| pgs000585 | 1300/1301                  | 0.648    | 0.808     | 0.777           | -0.031                             | 0.787   | 0.792         | 0.005                            |

| PRS       | SNPs matched / SNPs in PRS | PRS Only | Total PSA | PRS + Total PSA | Change in AUC from Total PSA Alone | 4Kscore | PRS + 4Kscore | Change in AUC from 4Kscore Alone |
|-----------|----------------------------|----------|-----------|-----------------|------------------------------------|---------|---------------|----------------------------------|
| pgs000586 | 1023/1023                  | 0.649    | 0.808     | 0.779           | -0.029                             | 0.787   | 0.795         | 0.008                            |
| pgs000587 | 26400/26418                | 0.656    | 0.808     | 0.777           | -0.030                             | 0.787   | 0.794         | 0.007                            |
| pgs000588 | 178191/178259              | 0.652    | 0.808     | 0.775           | -0.032                             | 0.787   | 0.792         | 0.005                            |
| pgs000589 | 42/42                      | 0.591    | 0.808     | 0.774           | -0.033                             | 0.787   | 0.783         | -0.004                           |
| pgs000590 | 1119236/1119236            | 0.599    | 0.808     | 0.781           | -0.027                             | 0.787   | 0.785         | -0.002                           |
| pgs000591 | 79/80                      | 0.608    | 0.808     | 0.773           | -0.034                             | 0.787   | 0.783         | -0.005                           |
| pgs000592 | 1323/1334                  | 0.589    | 0.808     | 0.779           | -0.029                             | 0.787   | 0.788         | 0.001                            |
| pgs000662 | 269/269                    | 0.649    | 0.808     | 0.778           | -0.030                             | 0.787   | 0.795         | 0.008                            |
| pgs000714 | 55/55                      | 0.526    | 0.808     | 0.797           | -0.010                             | 0.787   | 0.779         | -0.008                           |
| pgs000719 | 134/134                    | 0.625    | 0.808     | 0.783           | -0.024                             | 0.787   | 0.797         | 0.009                            |
| pgs000733 | 49/49                      | 0.564    | 0.808     | 0.778           | -0.029                             | 0.787   | 0.786         | -0.001                           |
